## Correction: Teneligliptin enhances the beneficial effects of GLP-1 in endothelial cells exposed to hyperglycemic conditions

**Valeria De Nigris<sup>1</sup>, Francesco Prattichizzo<sup>2</sup>, Elettra Mancuso<sup>1,3</sup>, Rosangela Spiga<sup>1,3</sup>, Gemma Pujadas<sup>1</sup> and Antonio Ceriello<sup>1,2,4</sup>**

<sup>1</sup> Institut d'Investigacions Biomeèdiques August Pi i Sunyer (IDIBAPS), Barcelona, Spain

<sup>2</sup> Istituto di Ricovero e Cura a Carattere Scientifico (IRCCS) MultiMedica, Milan, Italy

<sup>3</sup> Department of Medical and Surgical Sciences, University Magna Græcia of Catanzaro, Catanzaro, Italy

<sup>4</sup> Centro de Investigación Biomeédica en Red de Diabetes y Enfermedades Metabólicas Asociadas (CIBERDEM), Madrid, Spain

**Published:** October 26, 2018

**Copyright:** De Nigris et al. This is an open-access article distributed under the terms of the Creative Commons Attribution License 3.0 (CC BY 3.0), which permits unrestricted use, distribution, and reproduction in any medium, provided the original author and source are credited.

**This article has been corrected:** The correct affiliations are given below:

<sup>1</sup> Institut d'Investigacions Biomeèdiques August Pi i Sunyer (IDIBAPS), Barcelona, Spain

<sup>4</sup> Centro de Investigación Biomeédica en Red de Diabetes y Enfermedades Metabólicas Asociadas (CIBERDEM), Madrid, Spain

Original article: Oncotarget. 2018; 9:8898-8910. <https://doi.org/10.18632/oncotarget.22849>
